# Supplementary material for: Comparison between Deep-Learning-Based Ultra-Wide-Field Fundus Imaging and True-Colour Confocal Scanning for Diagnosing Glaucoma
Source: MDPI journal article supplement (doi:10.3390/jcm11113168), 2022-06-02
Supplement: s1 [file s1]

**Table S3. K-fold Cross Validation Verification (k=5)**

| Accuracy (%)                         | Test1 | Test2 | Test3 | Test4 | Test5 | Mean  | Accuracy |
|--------------------------------------|-------|-------|-------|-------|-------|-------|----------|
| True-color confocal scanner using DL | 84.59 | 81.41 | 83.11 | 82.57 | 84.71 | 83.27 | 81.46    |

UWF, ultra-wide field; DL, deep learning; five test groups and the accuracy evaluation and average of each group
