# Supplementary material for: Comparison between Deep-Learning-Based Ultra-Wide-Field Fundus Imaging and True-Colour Confocal Scanning for Diagnosing Glaucoma
Source: MDPI journal article supplement (doi:10.3390/jcm11113168), 2022-06-02
Supplement: s1 [file s1]

**Table S2. K-fold Cross Validation Verification (k=5)**

| Accuracy (%)                   | Test1 | Test2 | Test3 | Test4 | Test5 | Mean  | Accuracy |
|--------------------------------|-------|-------|-------|-------|-------|-------|----------|
| UWF fundus<br>imaging using DL | 87.14 | 80.64 | 81.41 | 84.61 | 88.41 | 84.44 | 83.62    |

UWF, ultra-wide field; DL, deep learning; five test groups and the accuracy evaluation and average of each group
