# Supplementary material for: Comparison between Deep-Learning-Based Ultra-Wide-Field Fundus Imaging and True-Colour Confocal Scanning for Diagnosing Glaucoma
Source: MDPI journal article supplement (doi:10.3390/jcm11113168), 2022-06-02
Supplement: s1 [file s1]

**Table S1. CNN Accuracy**

| Accuracy (%) | UWF fundus imaging<br>using DL | True-color confocal<br>scanner using DL |
|--------------|--------------------------------|-----------------------------------------|
| AlexNet      | 80.13                          | 79.51                                   |
| VGGNet       | 83.62                          | 81.46                                   |
| ResNet50     | 82.71                          | 81.42                                   |

UWF, ultra-wide field; DL, deep learning; Comparison of representative Convolution Neural Network
